# Supplementary material for: Prognostic significance of FAM83D gene expression across human cancer types
Source: PubMed Central journal article supplement (PMC4823109; doi:10.18632/oncotarget.6620), 2015-12-15
Supplement: oncotarget-07-3332-s001.pdf [file oncotarget-07-3332-s001.pdf]

SUPPLEMENTARY FIGURES AND TABLES

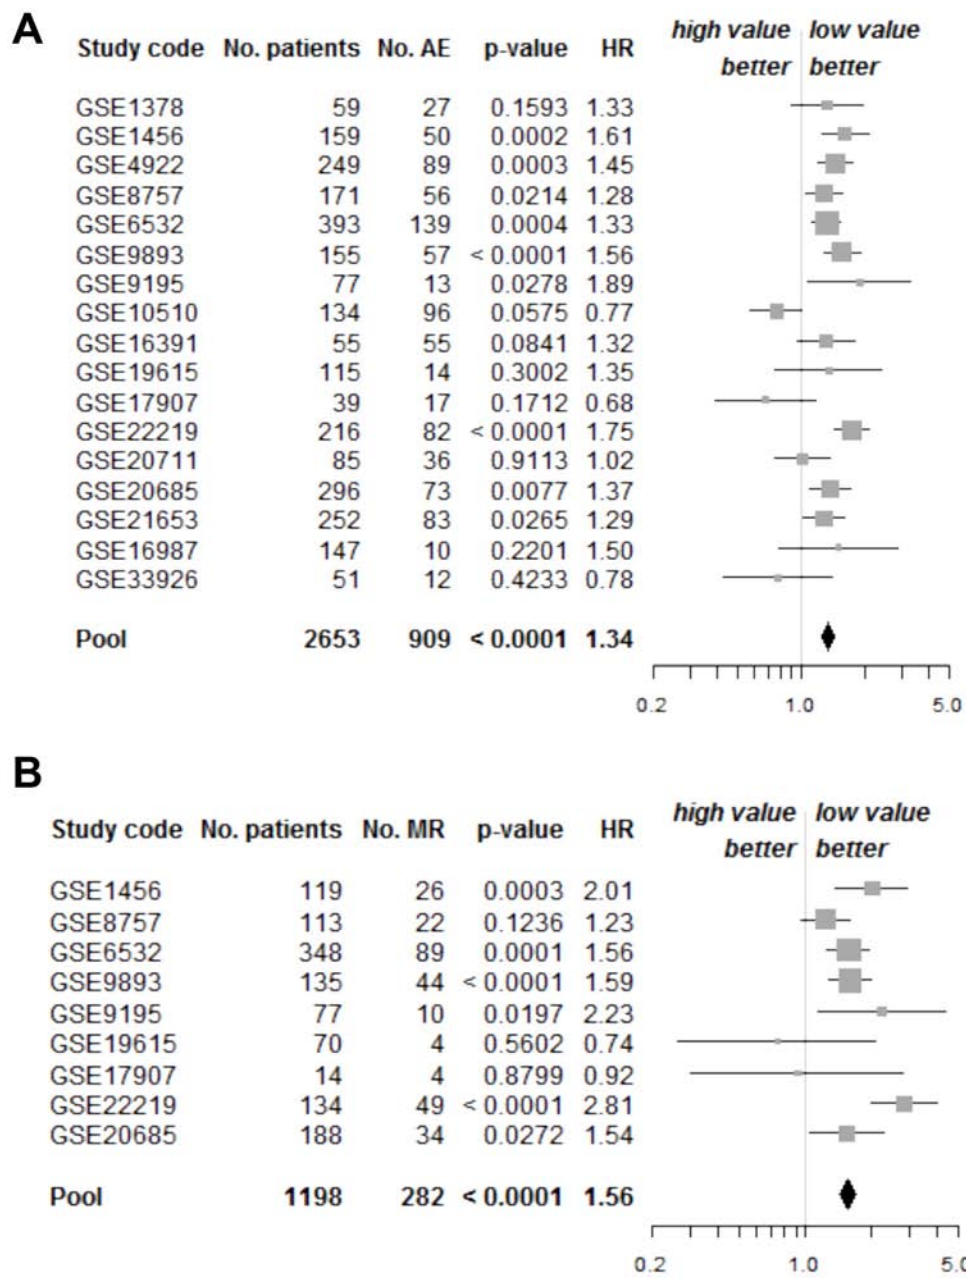

Supplementary Figure S1: Forest plot shows impact of *FAM83D* expression on: A. AE- and B. MR-free survival.

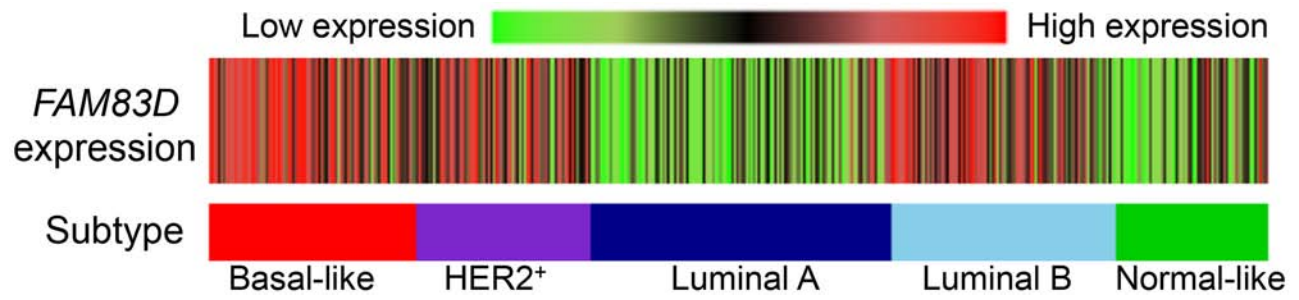

Supplementary Figure S2: *FAM83D* expression in different molecular subtypes.

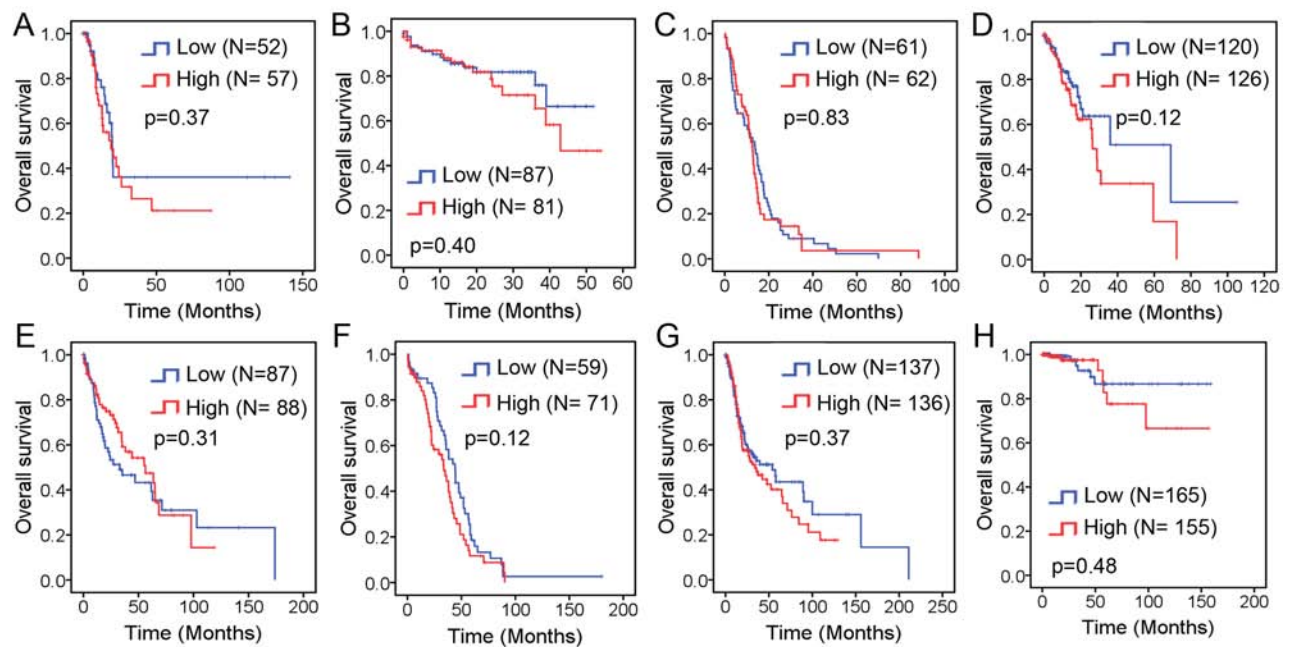

Supplementary Figure S3: Impact of *FAM83D* expression level on overall survival in patients with: A. Bladder urothelial carcinoma, B. Colorectal adenocarcinoma, C. Glioblastoma multiforme, D. Stomach adenocarcinoma, E. Lung squamous cell carcinoma, F. Ovarian serous cystadenocarcinoma, G. Head and neck squamous cell carcinoma, and H. Thyroid carcinoma.

**Supplementary Table S1: Information of TCGA datasets used in this study.**

| <b>Cancer types</b>                   | <b>Number of patients</b> | <b>Overall survival</b> |
|---------------------------------------|---------------------------|-------------------------|
| Adrenocortical Carcinoma              | 75                        | No                      |
| Brain Lower Grade Glioma              | 286                       | Yes                     |
| Bladder Urothelial Carcinoma          | 126                       | Yes                     |
| Breast Cancer                         | 959                       | Yes                     |
| Cervical Squamous Cell Carcinoma      | 190                       | Yes                     |
| Colorectal Adenocarcinoma             | 182                       | Yes                     |
| Glioblastoma Multiforme               | 136                       | Yes                     |
| Kidney Renal Clear Cell Carcinoma     | 413                       | Yes                     |
| Kidney Renal Papillary Cell Carcinoma | 161                       | Yes                     |
| Liver Hepatocellular Carcinoma        | 190                       | Yes                     |
| Lung Adenocarcinoma                   | 171                       | Yes                     |
| Lung Squamous Cell Carcinoma          | 178                       | Yes                     |
| Stomach Adenocarcinoma                | 258                       | Yes                     |
| Ovarian Serous Cystadenocarcinoma     | 158                       | Yes                     |
| Pancreatic Adenocarcinoma             | 83                        | No                      |
| Prostate Adenocarcinoma               | 257                       | No                      |
| Skin Cutaneous Melanoma               | 278                       | Yes                     |
| Head and Neck Squamous Cell Carcinoma | 279                       | Yes                     |
| Sarcoma                               | 253                       | No                      |
| Thyroid Carcinoma                     | 397                       | Yes                     |
| Uterine Corpus Endometrioid Carcinoma | 232                       | Yes                     |
| Uterine Carcinosarcoma                | 56                        | No                      |

**Supplementary Table S2: *FAM83D* expression in the patients with different copy number changes of *FAM83D*. The *p*-values was obtained by Mann-Whitney test.**

| Cancer types                          | loss | no change | gain | p-value (gain vs no change) | p-value (loss vs no change)* |
|---------------------------------------|------|-----------|------|-----------------------------|------------------------------|
| Adrenocortical Carcinoma              | 2    | 31        | 42   | 0.35                        | ND                           |
| Brain Lower Grade Glioma              | 1    | 259       | 26   | <b>0.007</b>                | ND                           |
| Bladder Urothelial Carcinoma          | 2    | 38        | 86   | 0.059                       | ND                           |
| Breast Cancer                         | 56   | 500       | 403  | <b>&lt;0.001</b>            | <b>&lt;0.001</b>             |
| Cervical Squamous Cell Carcinoma      | 5    | 108       | 77   | <b>0.010</b>                | ND                           |
| Colorectal Adenocarcinoma             |      | 46        | 136  | <b>0.004</b>                | ND                           |
| Glioblastoma Multiforme               | 3    | 82        | 51   | 0.27                        | ND                           |
| Kidney Renal Clear Cell Carcinoma     |      | 314       | 99   | <b>&lt;0.001</b>            | ND                           |
| Kidney Renal Papillary Cell Carcinoma | 1    | 105       | 55   | <b>0.049</b>                | ND                           |
| Liver Hepatocellular Carcinoma        | 6    | 121       | 63   | <b>&lt;0.001</b>            | ND                           |
| Lung Adenocarcinoma                   | 30   | 67        | 74   | <b>&lt;0.001</b>            | 0.50                         |
| Lung Squamous Cell Carcinoma          | 18   | 67        | 93   | 0.68                        | <b>0.001</b>                 |
| Stomach Adenocarcinoma                | 1    | 98        | 159  | <b>0.008</b>                | ND                           |
| Ovarian Serous Cystadenocarcinoma     | 12   | 66        | 80   | 0.14                        | <b>&lt;0.001</b>             |
| Pancreatic Adenocarcinoma             | 2    | 63        | 18   | <b>0.001</b>                | ND                           |
| Prostate Adenocarcinoma               | 7    | 241       | 9    | 0.36                        | ND                           |
| Skin Cutaneous Melanoma               | 4    | 134       | 140  | <b>&lt;0.001</b>            | ND                           |
| Head and Neck Squamous Cell Carcinoma | 17   | 148       | 114  | <b>0.001</b>                | 0.072                        |
| Sarcoma                               | 20   | 134       | 99   | <b>&lt;0.001</b>            | 0.29                         |
| Thyroid Carcinoma                     |      | 386       | 11   | <b>0.014</b>                | ND                           |
| Uterine Corpus Endometrioid Carcinoma | 2    | 203       | 27   | <b>&lt;0.001</b>            | ND                           |
| Uterine Carcinosarcoma                | 3    | 10        | 43   | 0.72                        | ND                           |

\* ND = not done, because there are no cases or a small number (<10) of cases with loss

Supplementary Table S3: *FAM83D* expression in the patients with *TP53* wild-type or mutations. The *p*-values was obtained by Mann-Whitney test.

| Cancer types                          | wild type | mutation | p-value*         |
|---------------------------------------|-----------|----------|------------------|
| Adrenocortical Carcinoma              | 60        | 15       | <b>&lt;0.001</b> |
| Brain Lower Grade Glioma              | 139       | 147      | 0.16             |
| Bladder Urothelial Carcinoma          | 63        | 63       | <b>0.003</b>     |
| Breast Cancer                         | 664       | 295      | <b>&lt;0.001</b> |
| Cervical Squamous Cell Carcinoma      | 181       | 9        | ND               |
| Colorectal Adenocarcinoma             | 89        | 93       | 0.17             |
| Glioblastoma Multiforme               | 93        | 43       | <b>&lt;0.001</b> |
| Kidney Renal Clear Cell Carcinoma     | 407       | 6        | ND               |
| Kidney Renal Papillary Cell Carcinoma | 157       | 4        | ND               |
| Liver Hepatocellular Carcinoma        | 130       | 60       | <b>&lt;0.001</b> |
| Lung Adenocarcinoma                   | 85        | 86       | <b>&lt;0.001</b> |
| Lung Squamous Cell Carcinoma          | 37        | 141      | 0.094            |
| Stomach Adenocarcinoma                | 141       | 117      | <b>0.004</b>     |
| Ovarian Serous Cystadenocarcinoma     | 18        | 140      | 0.67             |
| Pancreatic Adenocarcinoma             | 29        | 54       | 0.59             |
| Prostate Adenocarcinoma               | 233       | 24       | <b>0.004</b>     |
| Skin Cutaneous Melanoma               | 232       | 46       | <b>0.002</b>     |
| Head and Neck Squamous Cell Carcinoma | 75        | 204      | 0.37             |
| Sarcoma                               | NA        | NA       | NA               |
| Thyroid Carcinoma                     | 394       | 3        | ND               |
| Uterine Corpus Endometrioid Carcinoma | 165       | 67       | <b>&lt;0.001</b> |
| Uterine Carcinosarcoma                | 5         | 51       | ND               |

\* ND = not done, because there are a small number (<10) of cases with *p53* mutation. NA = data not available.
